# Supplementary material for: Phase stability and lattice dynamics of ammonium azide under hydrostatic compression
Source: Royal Society of Chemistry journal article supplement (doi:10.1039/c5cp04294a), 2015-01-01
Supplement: c5cp04294a1.pdf [file c5cp04294a1.pdf]

## Supplemental material

### Phase stability and lattice dynamics of Ammonium Azide under hydrostatic compression

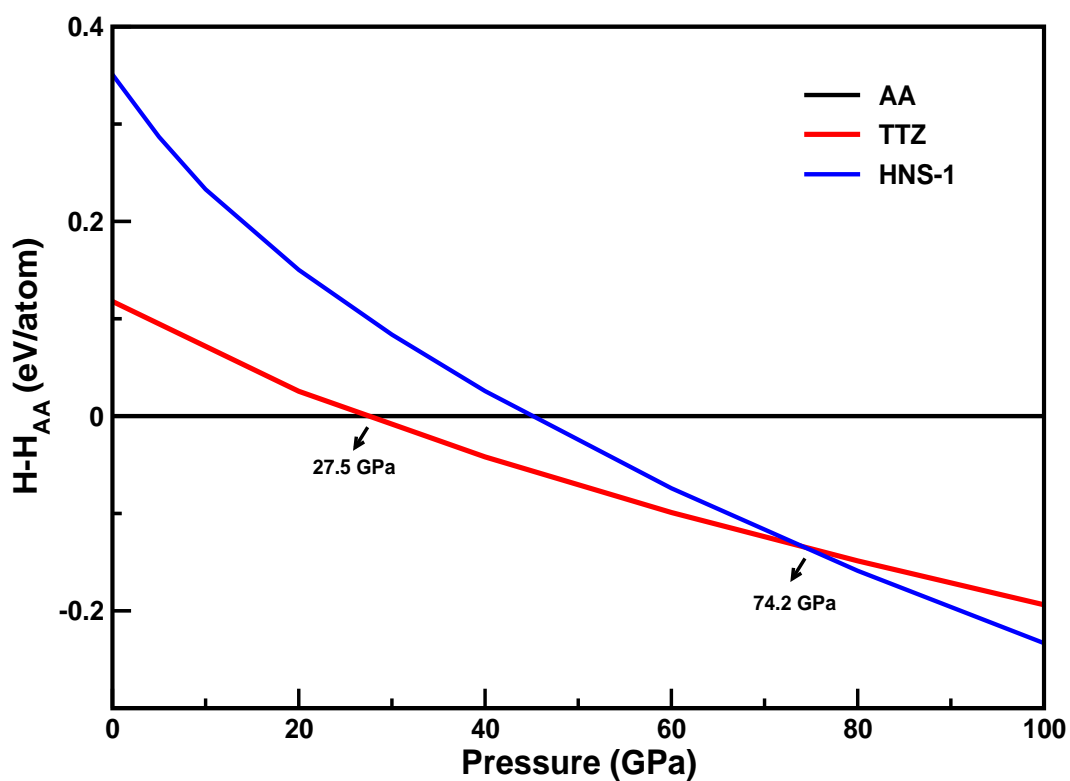

FIG. 1: (Colour online) Calculated relative enthalpies of TTZ, HNS-1, and HNS-2 polymorphic phases of  $N_4H_4$  with respect to AA with USPP approach using CASTEP package.

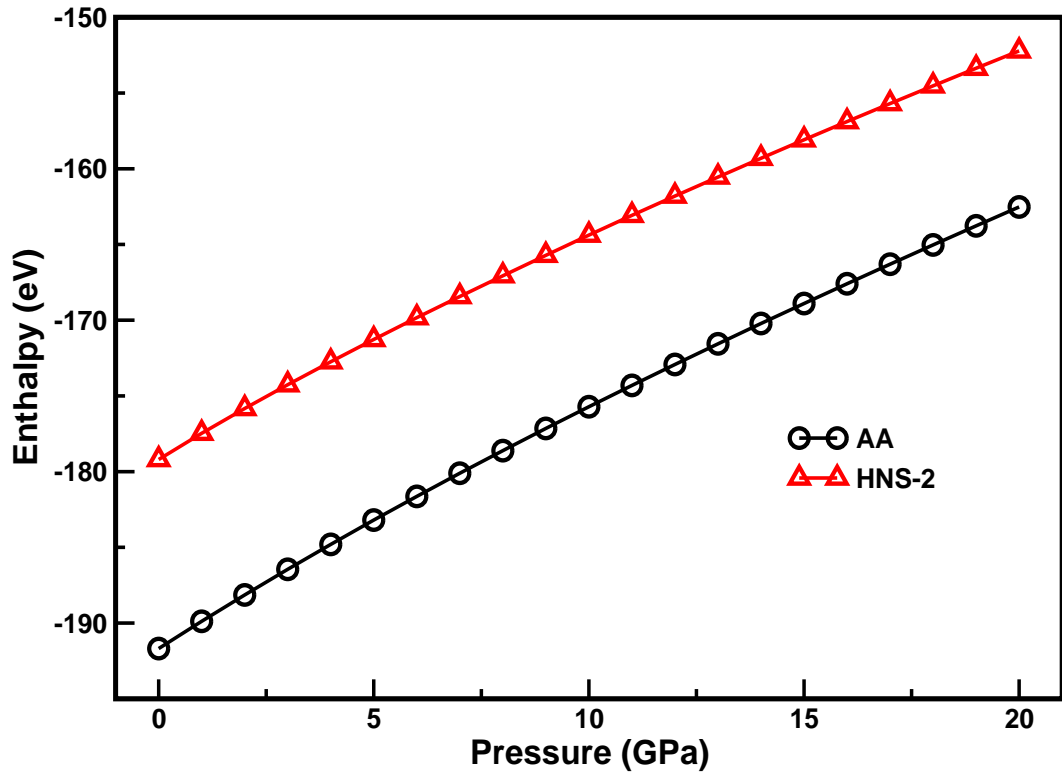

FIG. 2: (Colour online) Calculated enthalpies of AA and HNS-2 polymorphic phases of  $N_4H_4$  up to 20 GPa with TS-SCS scheme with VASP package.

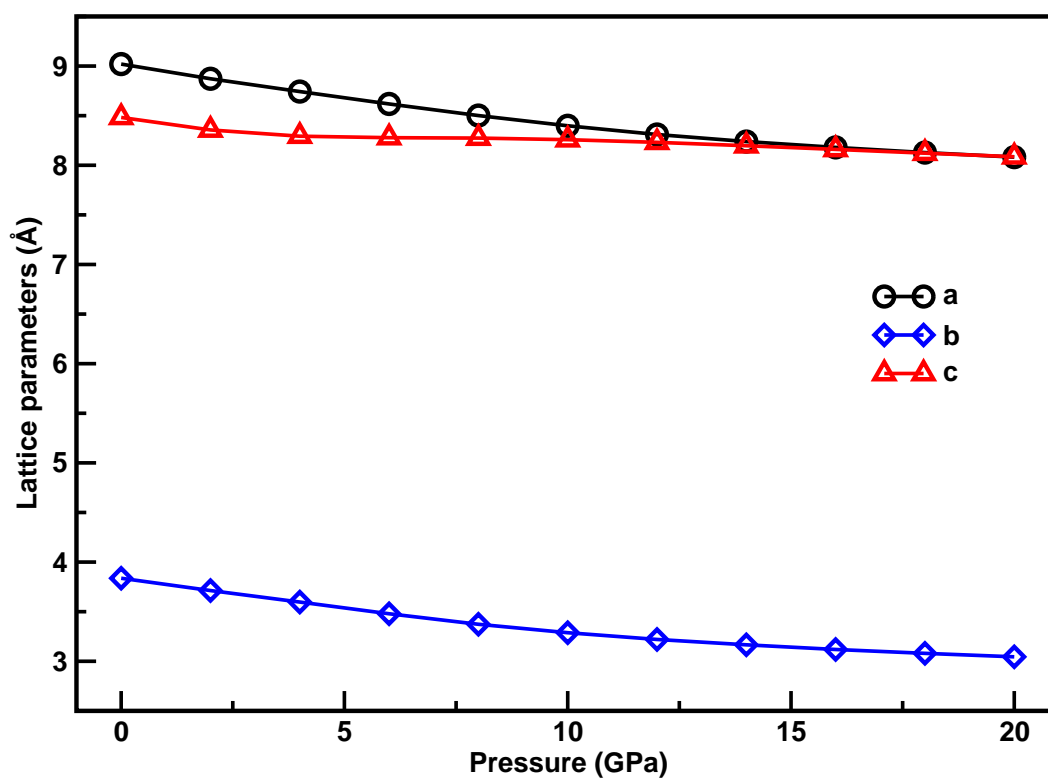

FIG. 3: (Colour online) Calculated lattice constants of AA as a function of pressure up to 20 GPa with TS-SCS scheme with VASP package.

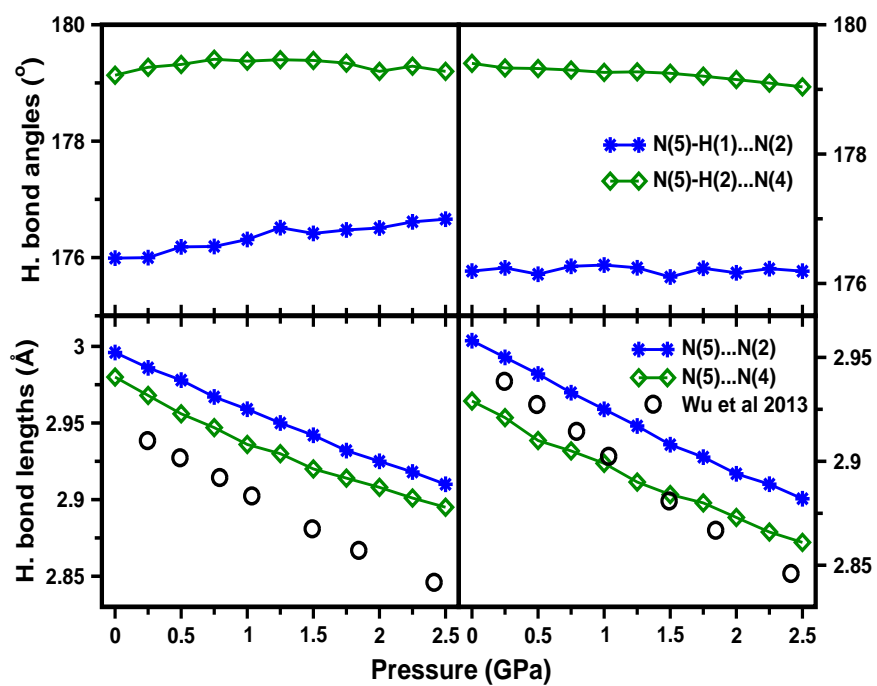

FIG. 4: (Colour online) Calculated Hydrogen bond lengths and angles of AA as a function of pressure. The left and right panels correspond to PBE and vdW-TS, respectively. The experimental data is taken from Ref.<sup>1</sup>

TABLE I: The calculated zone-center optical modes of AA with (vdW-TS) dispersion corrected functional

| Mode | Symmetry | vdW-TS | Assignment                  |
|------|----------|--------|-----------------------------|
| M96  | $B_{3g}$ | 3102.9 | N-H Asym. Str.              |
| M95  | $B_{3g}$ | 3083.5 | N-H Asym. Str.              |
| M94  | $B_{1g}$ | 3015.5 | N-H Asym. Str.              |
| M93  | $B_{3u}$ | 3015.1 | N-H Asym. Str.              |
| M92  | $B_{1u}$ | 3012.4 | N-H Asym. Str.              |
| M91  | $B_{1u}$ | 2989.2 | N-H Asym. Str.              |
| M90  | $B_{1g}$ | 2986.7 | N-H Asym. Str.              |
| M89  | $B_{3u}$ | 2983.2 | N-H Asym. Str.              |
| M88  | $A_g$    | 3069.4 | N-H Symm. Str.              |
| M87  | $A_u$    | 3006.0 | N-H Symm. Str.              |
| M86  | $B_{2g}$ | 3004.5 | N-H Symm. Str.              |
| M85  | $B_{2u}$ | 3001.2 | N-H Symm. Str.              |
| M84  | $A_g$    | 2997.8 | N-H Symm. Str.              |
| M83  | $B_{2u}$ | 2988.6 | N-H Symm. Str.              |
| M82  | $B_{2g}$ | 2983.7 | N-H Symm. Str.              |
| M81  | $A_u$    | 2980.9 | N-H Symm. Str.              |
| M80  | $A_u$    | 1953.1 | N=N=N (Type-I) Asymm. str.  |
| M79  | $B_{2u}$ | 1930.3 | N=N=N (Type-II) Asymm. str. |
| M78  | $B_{3u}$ | 1894.7 | N=N=N (Type-I) Asymm. str.  |
| M77  | $B_{1u}$ | 1888.3 | N=N=N (Type-II) Asymm. str. |
| M76  | $A_g$    | 1724.3 | N-H Scissor.                |
| M75  | $A_u$    | 1704.8 | N-H Scissor. + Bend.        |
| M74  | $B_{2u}$ | 1712.2 | N-H Bend.                   |
| M73  | $A_g$    | 1711.4 | N-H Bend.                   |
| M72  | $B_{2g}$ | 1701.8 | N-H Bend.                   |
| M71  | $B_{2u}$ | 1693.4 | N-H Bend.                   |

|     |          |        |                                     |
|-----|----------|--------|-------------------------------------|
| M70 | $A_u$    | 1696.1 | N-H Bend.                           |
| M69 | $B_{2g}$ | 1686.7 | N-H Bend.                           |
| M68 | $B_{3g}$ | 1473.8 | N-H Wagg. + Rock.                   |
| M67 | $B_{1u}$ | 1462.1 | N-H Wagg. + Rock.                   |
| M66 | $B_{3g}$ | 1457.9 | N-H Wagg. + Rock.                   |
| M65 | $B_{3u}$ | 1456.8 | N-H Wagg. + Rock.                   |
| M64 | $B_{1g}$ | 1452.7 | N-H Wagg. + Rock.                   |
| M63 | $B_{3u}$ | 1437.7 | N-H Wagg. + Rock.                   |
| M62 | $B_{1u}$ | 1435.5 | N-H Wagg. + Rock.                   |
| M61 | $B_{1g}$ | 1431.8 | N-H Wagg. + Rock.                   |
| M60 | $A_g$    | 1452.4 | N-H Scissor. + Wagg.                |
| M59 | $B_{2u}$ | 1424.4 | N-H Scissor. + Wagg.                |
| M58 | $B_{2g}$ | 1421.7 | N-H Scissor. + Wagg.                |
| M57 | $A_u$    | 1419.9 | N-H Scissor. + Wagg.                |
| M56 | $B_{3g}$ | 1234.0 | N=N=N (Type-II) Symm str.           |
| M55 | $A_g$    | 1233.8 | N=N=N (Type-II) Symm str.           |
| M54 | $B_{3g}$ | 1228.7 | N=N=N (Type-I) Symm str.            |
| M53 | $A_g$    | 1228.4 | N=N=N (Type-I) Symm str.            |
| M52 | $B_{2u}$ | 649.5  | $N_3$ (Type-I) Bend. + $NH_4$ Rot.  |
| M51 | $B_{1u}$ | 647.8  | $N_3$ (Type-I) Bend. + $NH_4$ Rot.  |
| M50 | $A_u$    | 631.0  | $N_3$ (Type-II) Bend. + $NH_4$ Rot. |
| M49 | $B_{3u}$ | 630.9  | $N_3$ (Type-II) Bend. + $NH_4$ Rot. |
| M48 | $B_{2u}$ | 599.5  | $N_3$ (Type-I) Bend.                |
| M47 | $B_{1u}$ | 599.4  | $N_3$ (Type-I) Bend.                |
| M46 | $B_{1u}$ | 594.6  | $N_3$ (Type-II) Bend.               |
| M45 | $B_{2u}$ | 593.7  | $N_3$ (Type-II) Bend.               |
| M44 | $B_{3g}$ | 525.1  | $NH_4$ Torsion.                     |
| M43 | $A_g$    | 515.6  | $NH_4$ Torsion.                     |
| M42 | $B_{2g}$ | 513.1  | $NH_4$ Torsion.                     |
| M41 | $B_{1u}$ | 509.2  | $NH_4$ Torsion.                     |

|     |          |       |                                      |
|-----|----------|-------|--------------------------------------|
| M40 | $B_{2u}$ | 508.3 | $NH_4$ Torsion.                      |
| M39 | $B_{1g}$ | 507.8 | $NH_4$ Torsion.                      |
| M38 | $B_{3u}$ | 507.1 | $NH_4$ Torsion.                      |
| M37 | $A_u$    | 505.8 | $NH_4$ Torsion.                      |
| M36 | $B_{3g}$ | 497.8 | $NH_4$ Torsion.                      |
| M35 | $B_{1u}$ | 486.9 | $NH_4$ Torsion.                      |
| M34 | $B_{1g}$ | 484.8 | $NH_4$ Torsion.                      |
| M33 | $B_{3u}$ | 476.5 | $NH_4$ Torsion.                      |
| M32 | $B_{2g}$ | 271.1 | Lattice Rot.                         |
| M31 | $B_{3g}$ | 260.7 | $NH_4$ Trans.                        |
| M30 | $B_{3g}$ | 238.7 | $NH_4$ Trans.                        |
| M29 | $B_{1g}$ | 258.3 | $N_3$ (Type-I) Rot. + $NH_4$ Trans.  |
| M28 | $B_{1g}$ | 233.7 | $N_3$ Rot. + $NH_4$ Trans.           |
| M27 | $B_{2g}$ | 227.9 | $N_3$ Rot. + $NH_4$ Trans.           |
| M26 | $A_g$    | 193.1 | $NH_4$ and $N_3$ (Type-II) Trans.    |
| M25 | $B_{1u}$ | 246.6 | $NH_4$ and $N_3$ (Type-I) Trans.     |
| M24 | $B_{2u}$ | 224.9 | $NH_4$ and $N_3$ (Type-I) Trans.     |
| M23 | $A_u$    | 182.9 | $NH_4$ and $N_3$ (Type-II) Trans.    |
| M22 | $B_{1u}$ | 182.6 | $NH_4$ and $N_3$ (Type-II) Trans.    |
| M21 | $B_{3u}$ | 203.3 | $NH_4$ and $N_3$ (Type-II) Trans.    |
| M20 | $B_{3u}$ | 211.6 | Lattice Trans.                       |
| M19 | $B_{2u}$ | 180.0 | Lattice Trans.                       |
| M18 | $A_u$    | 167.2 | Lattice Trans.                       |
| M17 | $B_{1u}$ | 118.0 | Lattice Trans.                       |
| M16 | $B_{3u}$ | 113.5 | Lattice Trans.                       |
| M15 | $A_u$    | 99.3  | Lattice Trans.                       |
| M14 | $B_{2g}$ | 145.3 | $N_3$ Rot. + $NH_4$ Trans.           |
| M13 | $B_{3g}$ | 136.8 | $N_3$ (Type-II) Rot. + $NH_4$ Trans. |
| M12 | $A_g$    | 129.8 | $N_3$ (Type-II) Rot. + $NH_4$ Trans. |
| M11 | $B_{1g}$ | 120.5 | $N_3$ Rot. + $NH_4$ Trans.           |

|     |          |       |                                    |
|-----|----------|-------|------------------------------------|
| M10 | $B_{1g}$ | 111.0 | $N_3$ Rot. + $NH_4$ Trans.         |
| M9  | $B_{1g}$ | 92.8  | $N_3$ Rot. + $NH_4$ Trans.         |
| M8  | $B_{2g}$ | 83.8  | $N_3$ (Type-I) Rot + $NH_4$ Trans. |
| M7  | $B_{2u}$ | 109.8 | $N_3$ Trans.                       |
| M6  | $B_{1u}$ | 109.0 | $NH_4$ and $N_3$ Trans.            |
| M5  | $B_{2u}$ | 87.9  | $NH_4$ and $N_3$ Trans.            |
| M4  | $B_{1u}$ | 80.4  | $NH_4$ and $N_3$ (Type-II) Trans.  |

---



---

<sup>1</sup> X. Wu, H. Cui, J. Zhang, R. Cong, H. Zhu, Q. Cui, *Appl. Phys. Lett.*, 2013, **102**, 121902.
